# Supplementary material for: An S4-symmetric mixed-valent decacopper cage comprised of [CuII(L-S2N2)] complexes bridged by CuI(MeCN)n(n = 1 or 2) cations
Source: Royal Society of Chemistry journal article supplement (doi:10.1039/c5dt04359j), 2016-01-01
Supplement: c5dt04359j1.pdf [file c5dt04359j1.pdf]

Supporting Information for

An  $S_4$ -Symmetric Mixed-Valent Decacopper  
Cage Comprised of  $[\text{Cu}^{\text{II}}(\text{L-S}_2\text{N}_2)]$  Complexes  
Bridged by  $\text{Cu}^{\text{I}}(\text{MeCN})_n$  ( $n = 1$  or  $2$ ) Cations

by Skylar J. Ferrara, Bo Wang and James P. Donahue

# UV-vis Spectrum in MeCN of [(Cu<sup>II</sup>(L-N<sub>2</sub>S<sub>2</sub>))<sub>4</sub>(μ<sub>2</sub>-Cu<sup>I</sup>(MeCN)<sub>2</sub>)<sub>2</sub>(μ<sub>3</sub>-Cu<sup>I</sup>(MeCN))<sub>4</sub>] [BF<sub>4</sub>]<sub>6</sub>·2.25MeCN

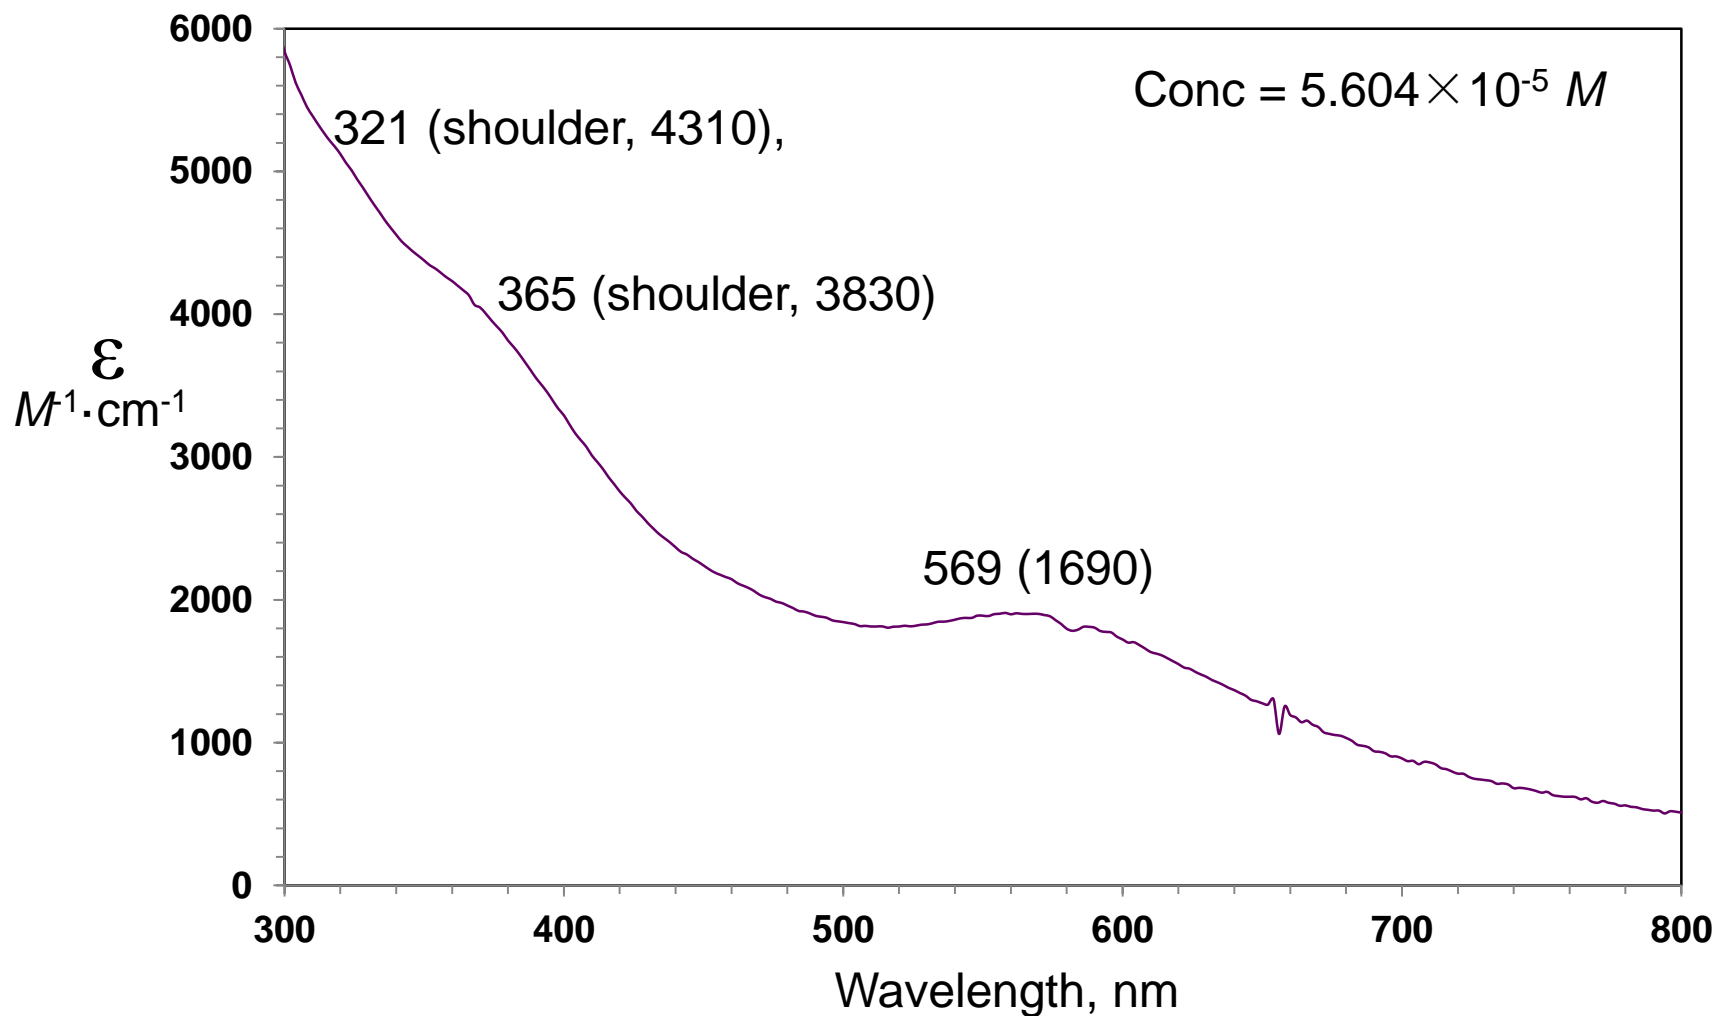

# Atom Labeling for Cation 1 of $[\text{Cu}_{10}(\text{S}(\text{CH}_2)_2\text{N}(\text{Me})\text{CH}_2-)_2(\text{MeCN})_8][\text{BF}_4]_6 \cdot (\text{MeCN})_{2.25}$

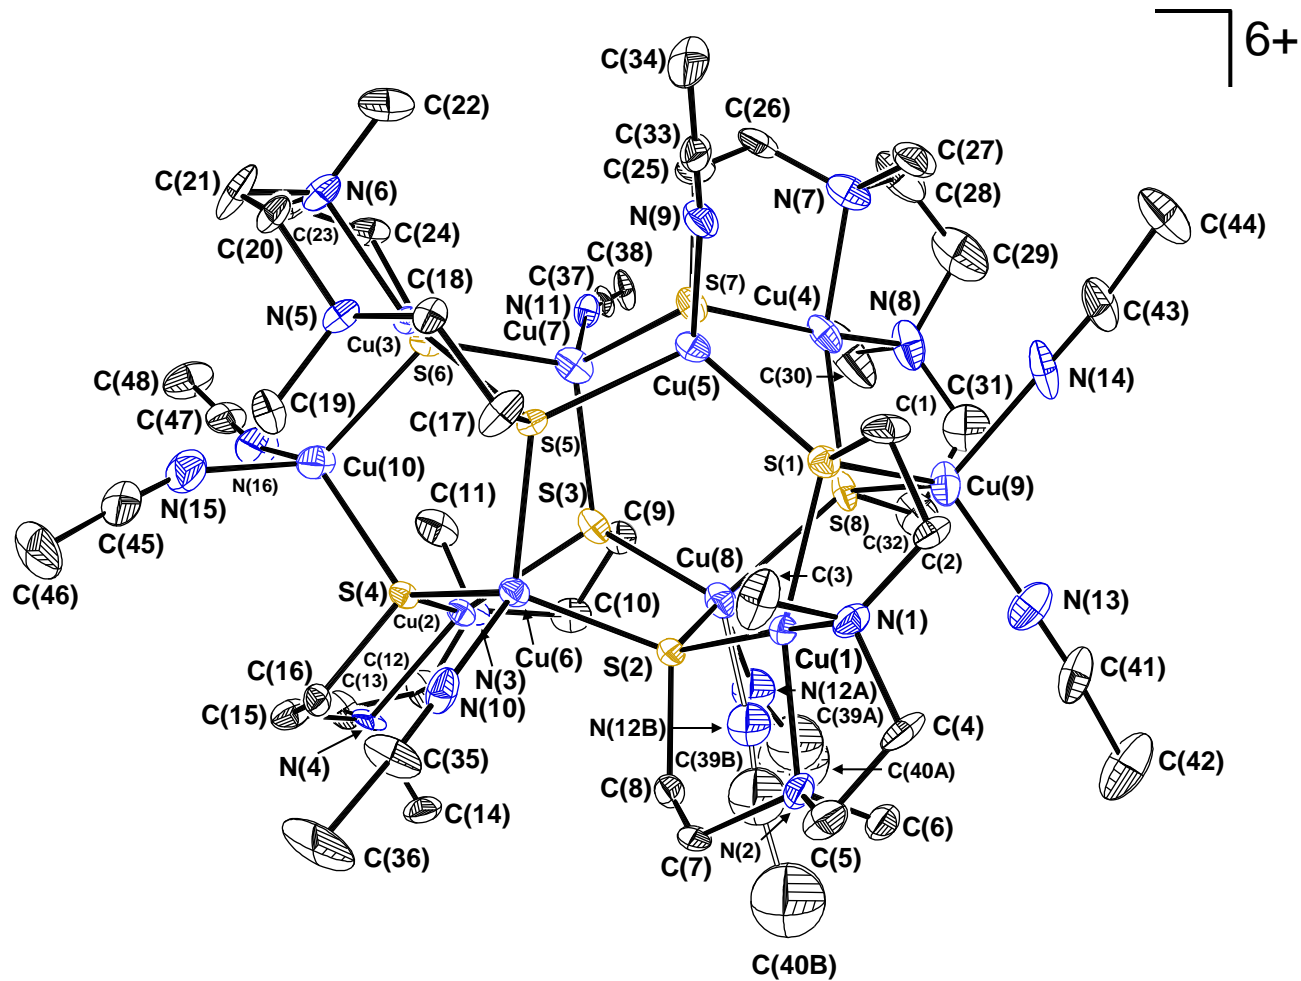

Thermal ellipsoid plot is drawn at the 40% probability level. Hydrogen atoms are omitted for clarity.

# Partial Atom Labeling for Cation 1 of $[\text{Cu}_{10}(\text{S}(\text{CH}_2)_2\text{N}(\text{Me})\text{CH}_2-)_2(\text{MeCN})_8][\text{BF}_4]_6 \cdot (\text{MeCN})_{2.25}$

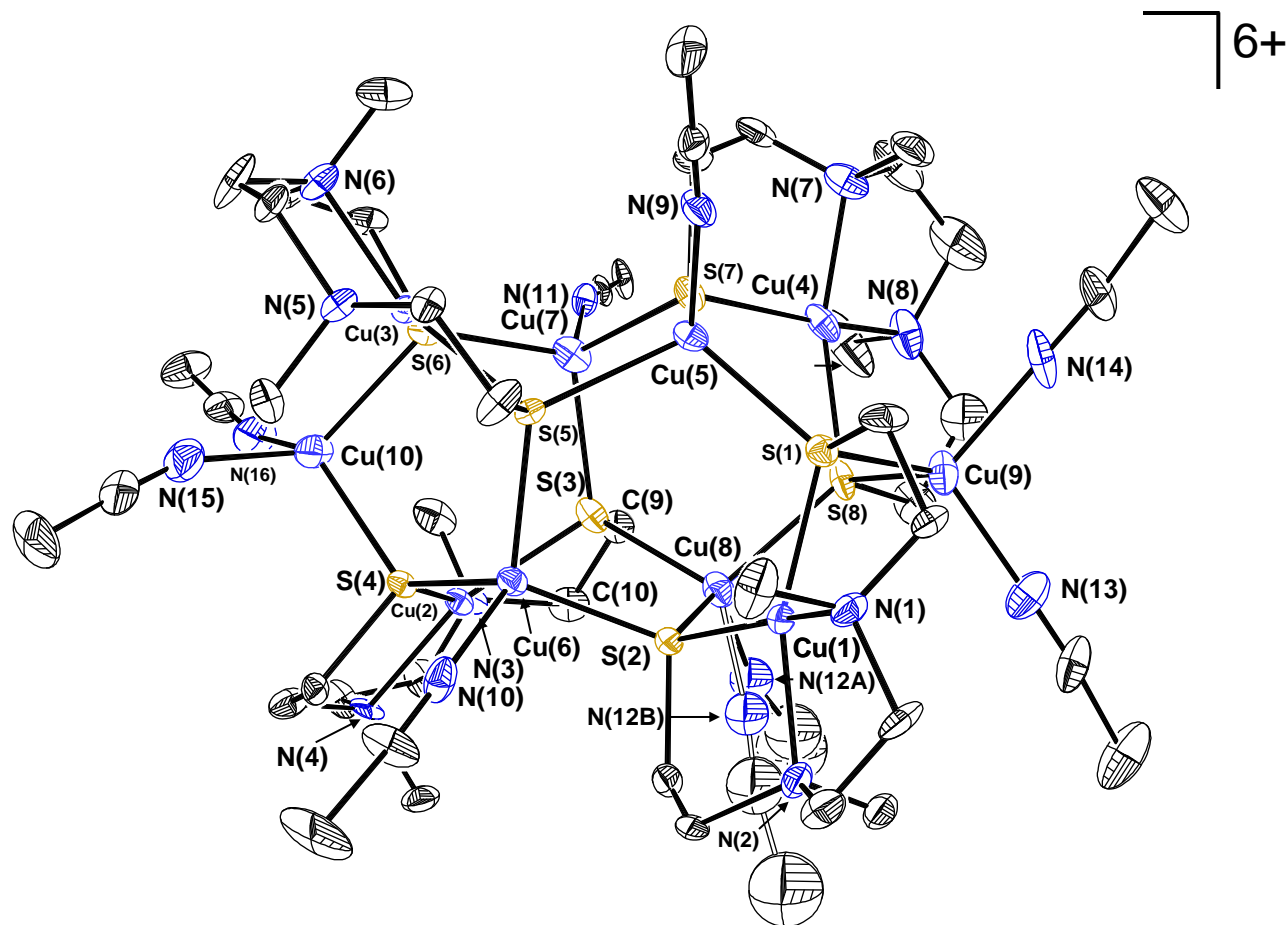

Thermal ellipsoid plot is drawn at the 40% probability level. Hydrogen atoms are omitted for clarity.

# Atom Labeling for Cation 2 of $[\text{Cu}_{10}(\text{S}(\text{CH}_2)_2\text{N}(\text{Me})\text{CH}_2^-)_2(\text{MeCN})_8][\text{BF}_4]_6 \cdot (\text{MeCN})_{2.25}$

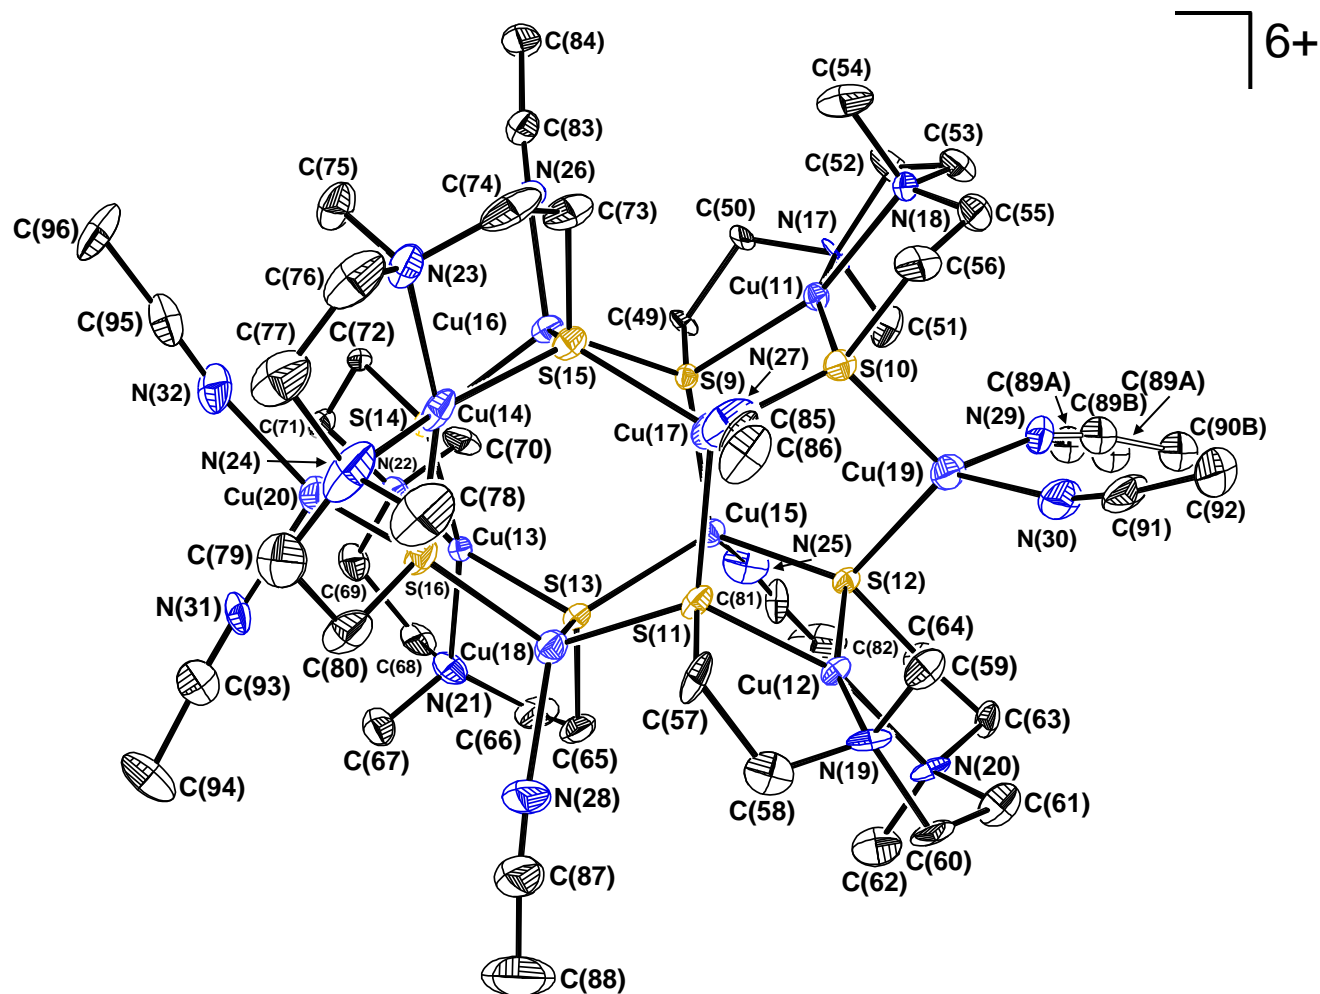

Thermal ellipsoid plot is drawn at the 40% probability level. Hydrogen atoms are omitted for clarity.

# Partial Atom Labeling for Cation 2 of $[\text{Cu}_{10}(\text{S}(\text{CH}_2)_2\text{N}(\text{Me})\text{CH}_2^-)_2(\text{MeCN})_8][\text{BF}_4]_6 \cdot (\text{MeCN})_{2.25}$

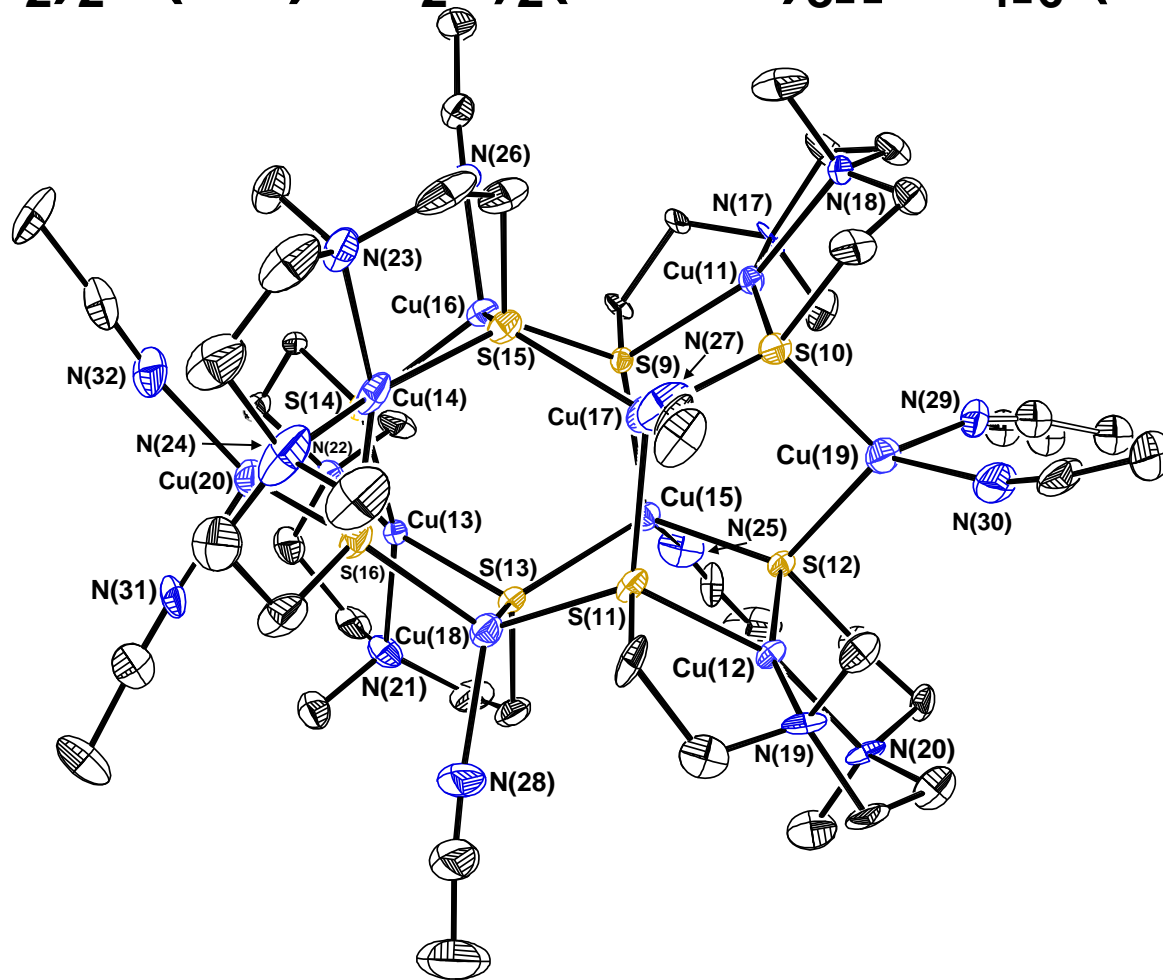

Thermal ellipsoid plot is drawn at the 40% probability level. Hydrogen atoms are omitted for clarity.

# Atom Labeling for $[\text{BF}_4]^{-1}$ Anions and Interstitial MeCN $[\text{Cu}_{10}(\text{S}(\text{CH}_2)_2\text{N}(\text{Me})\text{CH}_2-)_2(\text{MeCN})_8][\text{BF}_4]_6 \cdot (\text{MeCN})_{2.25}$

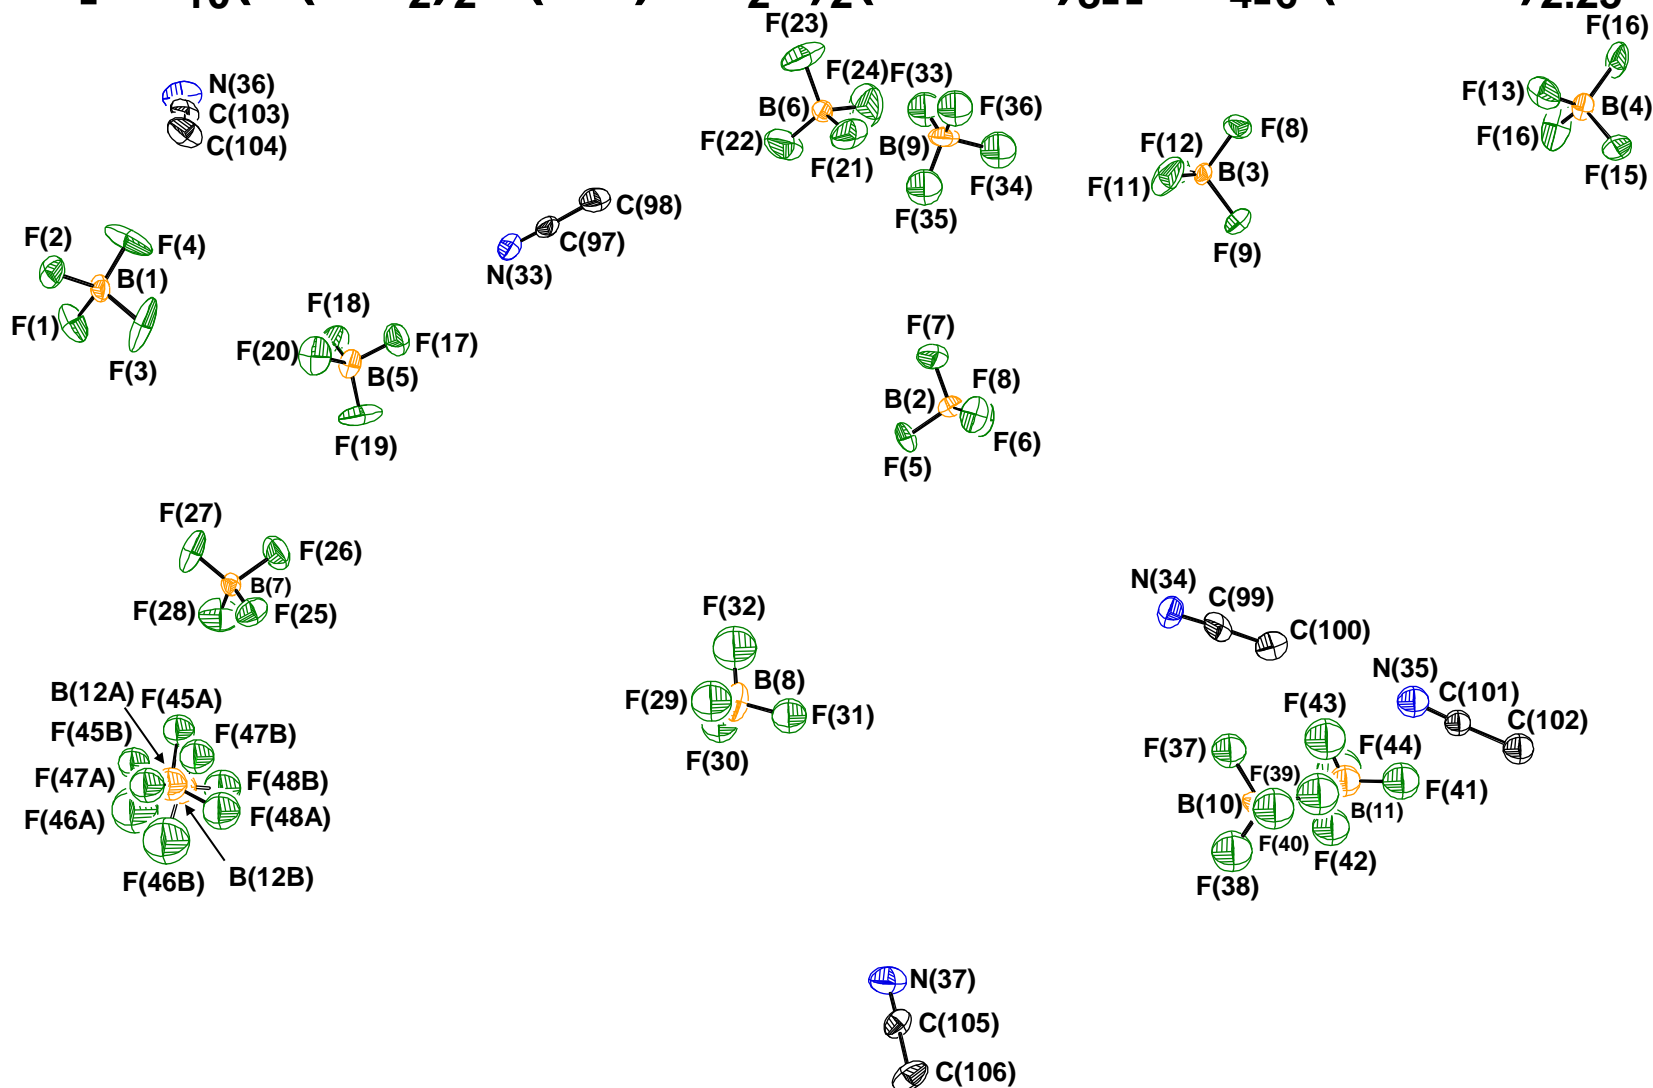

Thermal ellipsoid plot is drawn at the 40% probability level. Hydrogen atoms are omitted for clarity.
